# Supplementary material
Source: PubMed Central journal article supplement (PMC8033760)
Supplement: pt0c00218_si_001.pdf [file pt0c00218_si_001.pdf]

## Supporting Information

### Identification of small-molecule inhibitors of human inositol hexakisphosphate kinases by high throughput screening

Gangling Liao<sup>ζ‡</sup>, Wenjuan Ye<sup>#‡</sup>, Tyler Heitmann<sup>ζ</sup>, Glen Ernst<sup>ζ</sup>, Michael DePasquale<sup>ζ</sup>, Laiyi Xu<sup>€</sup>, Michael Wormald<sup>ζ‡</sup>, Xin Hu<sup>#</sup>, Marc Ferrer<sup>#</sup>, Robert K. Harmel<sup>£!</sup>, Dorothea Fiedler<sup>£!</sup>, James Barrow<sup>ζ</sup> and Huijun Wei<sup>ζ†\*</sup>

#### *Authors affiliations:*

# *National Center for Advancing Translational Sciences*, Rockville, MD, USA

ζ Lieber Institute for Brain Development, Baltimore, MD 21205, USA

€ Department of Chemistry, McGill University, Montreal, Quebec H3A 0G4, Canada,

£ Leibniz-Forschungsinstitut für Molekulare Pharmakologie, Robert-Rössle-Straße 10, 13125 Berlin, Germany

! Institut für Chemie, Humboldt-Universität zu Berlin , Brook-Taylor-Straße 2 , 12489 Berlin , Germany.

\*Corresponding Author: Department of Neurology, pharmacology and Johns Hopkins Drug Discovery, Johns Hopkins School of Medicine, Baltimore, Maryland. Email: Hwei11@jhmi.edu

## **Table of Contents**

|                                                                                   |             |
|-----------------------------------------------------------------------------------|-------------|
| <b>General Procedures</b>                                                         | <b>S-3</b>  |
| <b>Compound Synthesis and Characterization Data</b>                               | <b>S-4</b>  |
| <b>Supplemental Table 1. Summary of IC50s for 123 hits in 10-point DRCs</b>       | <b>S-14</b> |
| <b>Supplemental Table 2. Inhibition against 58 kinases by LI-2172 and LI-2242</b> | <b>S-17</b> |

## **General Procedures.**

All commercially available reagents and solvents were used without further purification unless otherwise stated. Automated flash chromatography was performed on an ISCO CombiFlash Rf™ or Biotage Isolera™ using Biotage, ISCO or Agela Flash cartridges with peak detection at 254 nm. Reverse phase purification was accomplished using a Gilson 215 liquid handler equipped with a Phenomenex C18 column (150 x 20 mm I.D., S-5 μm). Peak collection was triggered by UV detection at 214 or 254 nm. <sup>1</sup>H NMR spectra were recorded on a Bruker 400 instrument operating at 400 MHz with tetramethylsilane or residual protonated solvent used as a reference. Analytical LC-MS was performed using Agilent 1260 equipped with autosampler (Agilent Poroshell 120 C18 column (50 x 3.0 mm I.D., 2.7 μm); 0.05% TFA in water/acetonitrile gradient; UV detection at 215 and 254 nm) and electrospray ionization. All final compounds showed purity greater than 95% at 215 and 254 nm using this method. High-resolution mass spectral data was acquired from m/z 50 – 400 using an Agilent 6540 QTOF with a Jet Stream Ion Source in 4 GHz high resolution mode. Test articles were prepared in 0.1% formic acid in methanol and infused at 0.1 mL min<sup>-1</sup>. The data was analyzed using Agilent Masshunter Qualitative Analysis Software (B.07.00 SP2)

## Compound Synthesis and Characterization Data

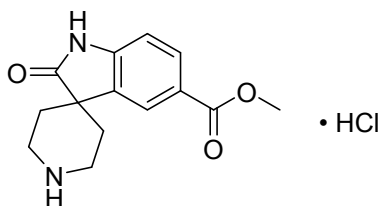

### Intermediate A: Methyl 2-oxospiro[indoline-3,4'-piperidine]-5-carboxylate hydrochloride

To a suspension of 1'-*tert*-butoxycarbonyl-2-oxospiro[indoline-3,4'-piperidine]-5-carboxylic acid (766 mg, 2.21 mmol) in methanol (10 mL) at 0 °C was added thionyl chloride (1.9 mL, 26 mmol). The resulting mixture was allowed to reach room temperature with stirring for 18 h. The solvent was removed in vacuo to give methyl 2-oxospiro[indoline-3,4'-piperidine]-5-carboxylate hydrochloride (600 mg, 2.02 mmol, 91.4% yield) as a yellow solid.

<sup>1</sup>H NMR (400 MHz, DMSO-*d*<sub>6</sub>) δ ppm 11.03 (s, 1 H) 8.87 (br. s., 2 H) 7.91 (dd, *J* = 8.08, 1.77 Hz, 1 H) 7.80 (d, *J* = 1.52 Hz, 1 H) 7.01 (d, *J* = 8.34 Hz, 1 H) 3.84 (s, 3 H) 3.44 - 3.54 (m, 2 H) 3.29 (d, *J* = 13.14 Hz, 2 H) 2.11 - 2.21 (m, 2 H) 1.93 (d, *J* = 14.40 Hz, 2 H)

LCMS: [M+1] = 261, rt = 1.40 min.

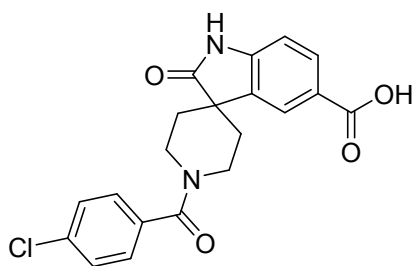

### Example LI-2172: 1'-(4-chlorobenzoyl)-2-oxospiro[indoline-3,4'-piperidine]-5-carboxylic acid

#### **Methyl 1'-(4-chlorobenzoyl)-2-oxospiro[indoline-3,4'-piperidine]-5-carboxylate**

To a suspension of methyl 2-oxospiro[indoline-3,4'-piperidine]-5-carboxylate hydrochloride (52 mg, 0.175 mmol), 4-chlorobenzoic acid (30.2 mg, 0.193 mmol) and HBTU (73.1 mg, 0.193 mmol) in chloroform (5 mL) was added DIPEA (93.8 μL, 0.526 mmol). The resulting mixture was stirred at room temperature for 2.5 h. The solvent was removed with a stream of N<sub>2</sub> and the residue triturated with water/MeOH (3:1) for 1 h. The solid was collected by filtration, washed with water and dried to give a solid which was purified by automated normal-phase chromatography (0-100% EtOAc/heptane, 4 g silica gel cartridge) to give methyl 1'-(4-chlorobenzoyl)-2-oxospiro[indoline-3,4'-piperidine]-5-carboxylate (52.4 mg, 0.131 mmol, 74.9% yield) as a white gummy solid.

$^1\text{H}$  NMR (400 MHz,  $\text{DMSO-}d_6$ )  $\delta$  ppm 10.86 (s, 1 H) 8.07 (d,  $J = 1.52$  Hz, 1 H) 7.88 (dd,  $J = 8.21, 1.64$  Hz, 1 H) 7.56 - 7.60 (m, 2 H) 7.51 - 7.55 (m, 2 H) 6.97 (d,  $J = 8.08$  Hz, 1 H) 4.20 (br. s., 1 H) 3.83 (s, 3 H) 3.76 (d,  $J = 9.85$  Hz, 2 H) 3.50 (br. s., 1 H) 1.94 - 2.04 (m, 2 H) 1.80 (br. s., 1 H) 1.66 (br. s., 1 H)

LCMS:  $[\text{M}+1] = 399/401$ ,  $rt = 2.34$  min.

### **1'-(4-chlorobenzoyl)-2-oxospiro[indoline-3,4'-piperidine]-5-carboxylic acid**

A suspension of methyl 1'-(4-chlorobenzoyl)-2-oxospiro[indoline-3,4'-piperidine]-5-carboxylate (52.4 mg, 0.131 mmol) and lithium hydroxide monohydrate (5.5 mg, 0.131 mmol) in THF (4 mL) and water (0.4 mL) was stirred at room temperature for 21 h, then at 40 °C for 21 h. The solvent was removed under a stream of  $\text{N}_2$  to give a residue which was taken up in water then filtered through a syringe filter. The solution was acidified by addition of 6 N HCl and stirred for 1 h. The solid was collected by filtration, washed with water and air-dried to give a residue which was purified by automated normal-phase chromatography (0-20% MeOH/DCM, 4 g silica gel cartridge) to give 1'-(4-chlorobenzoyl)-2-oxospiro[indoline-3,4'-piperidine]-5-carboxylic acid (4.7 mg, 0.012 mmol, 9.3% yield) as a white solid.

$^1\text{H}$  NMR (400 MHz,  $\text{DMSO-}d_6$ )  $\delta$  ppm 12.72 (br. s., 1 H) 10.82 (s, 1 H) 8.05 (s, 1 H) 7.86 (d,  $J = 8.08$  Hz, 1 H) 7.55 - 7.59 (m, 2 H) 7.51 - 7.55 (m, 2 H) 6.94 (d,  $J = 8.08$  Hz, 1 H) 4.17 (br. s., 1 H) 3.78 (t,  $J = 10.61$  Hz, 2 H) 3.50 (br. s., 1 H) 1.90 - 2.01 (m, 2 H) 1.80 (br. s., 1 H) 1.67 (br. s., 1 H)

LCMS:  $[\text{M}+1] = 385/387$ ,  $rt = 2.04$  min.

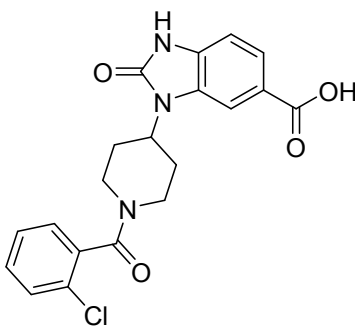

### **Example LI-2240: 3-(1-(2-chlorobenzoyl)piperidin-4-yl)-2-oxo-2,3-dihydro-1H-benzo[d]imidazole-5-carboxylic acid**

#### ***tert*-butyl 4-((5-(methoxycarbonyl)-2-nitrophenyl)amino)piperidine-1-carboxylate**

A mixture of methyl 3-fluoro-4-nitrobenzoate (302 mg, 1.52 mmol), *tert*-butyl 4-aminopiperidine-1-carboxylate (364 mg, 1.82 mmol) and cesium carbonate (593 mg, 1.82 mmol) in acetonitrile (10 mL) was stirred at room temperature for 90 h. The contents were taken up in EtOAc, washed with water (3x), brine (1x), dried over  $\text{MgSO}_4$ , filtered and the solvent removed in vacuo to give a residue which was purified by automated normal-phase chromatography (0-100% EtOAc/heptane, 20 g silica gel cartridge) to give *tert*-butyl 4-((5-(methoxycarbonyl)-2-nitrophenyl)amino)piperidine-1-carboxylate (440 mg, 1.16 mmol, 76.5% yield) as a yellow-orange solid.

<sup>1</sup>H NMR (400 MHz, DMSO-*d*<sub>6</sub>) δ ppm 8.19 (d, *J* = 8.84 Hz, 1 H) 7.90 (d, *J* = 8.08 Hz, 1 H) 7.60 (d, *J* = 1.52 Hz, 1 H) 7.17 (dd, *J* = 8.84, 1.77 Hz, 1 H) 3.84 - 3.98 (m, 6 H) 3.02 (br. s., 2 H) 1.94 (d, *J* = 10.36 Hz, 2 H) 1.44 - 1.55 (m, 2 H) 1.42 (s, 9 H)

LCMS: [M-1+23] = 402, rt = 1.90 min (lipophilic method).

#### ***tert*-butyl 4-((2-amino-5-(methoxycarbonyl)phenyl)amino)piperidine-1-carboxylate**

To a solution of *tert*-butyl 4-((5-(methoxycarbonyl)-2-nitrophenyl)amino)piperidine-1-carboxylate (440 mg, 1.16 mmol) in EtOAc (20 mL) was added 10% Pd/C (40 mg). The resulting suspension was placed under an atmosphere of H<sub>2</sub> via a balloon and stirred at room temperature for 18 h. The contents were filtered through Celite and the solvent removed in vacuo to give *tert*-butyl 4-((2-amino-5-(methoxycarbonyl)phenyl)amino)piperidine-1-carboxylate (400 mg, 1.145 mmol, 98.7% yield) as an off-white solid.

<sup>1</sup>H NMR (400 MHz, DMSO-*d*<sub>6</sub>) δ ppm 7.14 (dd, *J* = 8.08, 1.77 Hz, 1 H) 7.04 (d, *J* = 1.77 Hz, 1 H) 6.55 (d, *J* = 8.08 Hz, 1 H) 5.42 - 5.48 (m, 2 H) 4.41 (d, *J* = 7.58 Hz, 1 H) 3.89 (d, *J* = 10.11 Hz, 2 H) 3.72 (s, 3 H) 3.39 - 3.50 (m, 1 H) 2.94 (br. s., 2 H) 1.91 (d, *J* = 10.11 Hz, 2 H) 1.41 (s, 9 H) 1.21 - 1.33

LCMS: [M-1+23] = 350, rt = 1.14 min (lipophilic method).

#### **Methyl 3-(1-(*tert*-butoxycarbonyl)piperidin-4-yl)-2-oxo-2,3-dihydro-1*H*-benzo[*d*]imidazole-5-carboxylate**

To a solution of *tert*-butyl 4-((2-amino-5-(methoxycarbonyl)phenyl)amino)piperidine-1-carboxylate (247 mg, 0.708 mmol) in chloroform (5 mL) was added 1,1'-carbonyldiimidazole (172 mg, 1.06 mmol). The resulting mixture was stirred at 50 °C for 18 h. Added 1,1'-carbonyldiimidazole (86 mg, 0.53 mmol) and stirred at 50 °C for 18 h. The solvent was removed under a stream of N<sub>2</sub>, and the residue was purified by automated normal-phase chromatography (0-100% EtOAc/heptane, 4 g silica gel cartridge) to give methyl 3-(1-(*tert*-butoxycarbonyl)piperidin-4-yl)-2-oxo-2,3-dihydro-1*H*-benzo[*d*]imidazole-5-carboxylate (220 mg, 0.586 mmol, 82.8% yield) as an off-white solid.

<sup>1</sup>H NMR (400 MHz, DMSO-*d*<sub>6</sub>) δ ppm 11.36 (s, 1 H) 7.72 (d, *J* = 1.26 Hz, 1 H) 7.69 (dd, *J* = 8.08, 1.52 Hz, 1 H) 7.09 (d, *J* = 8.08 Hz, 1 H) 4.39 - 4.49 (m, 1 H) 4.01 - 4.14 (m, 2 H) 3.83 (s, 3 H) 2.91 (br. s., 2 H) 2.11 - 2.24 (m, 2 H) 1.71 (d, *J* = 10.11 Hz, 2 H) 1.45 (s, 9 H)

LCMS: [M-1]+23 = 398, rt = 2.44 min

#### **Methyl 2-oxo-3-(piperidin-4-yl)-2,3-dihydro-1*H*-benzo[*d*]imidazole-5-carboxylate hydrochloride**

To a suspension of methyl 3-(1-(*tert*-butoxycarbonyl)piperidin-4-yl)-2-oxo-2,3-dihydro-1*H*-benzo[*d*]imidazole-5-carboxylate (220 mg, 0.586 mmol) in methanol (5 mL) was added 6 N HCl (977 μL, 5.86 mmol). The resulting mixture was stirred at 60 °C for 4 h. The solvent was removed in vacuo to give methyl 2-oxo-3-(piperidin-4-yl)-2,3-dihydro-1*H*-benzo[*d*]imidazole-5-carboxylate hydrochloride (188 mg, 0.605 mmol, 103% yield) as a beige solid.

<sup>1</sup>H NMR (400 MHz, DMSO-*d*<sub>6</sub>) δ ppm 11.43 (s, 1 H) 9.03 (d, *J* = 11.37 Hz, 1 H) 8.67 (d, *J* = 8.59 Hz, 1 H) 7.90 (s, 1 H) 7.71 (dd, *J* = 8.08, 1.52 Hz, 1 H) 7.11 (d, *J* = 8.08 Hz, 1 H) 4.59 (ddd, *J* =

12.13, 8.08, 3.79 Hz, 1 H) 3.85 (s, 3 H) 3.42 (d,  $J = 11.87$  Hz, 2 H) 3.05 - 3.15 (m, 2 H) 2.53 - 2.64 (m, 2 H) 1.89 (d,  $J = 11.87$  Hz, 2 H)

LCMS:  $[M+1] = 276$ ,  $rt = 1.46$  min

### Methyl 3-(1-(2-chlorobenzoyl)piperidin-4-yl)-2-oxo-2,3-dihydro-1H-benzo[d]imidazole-5-carboxylate

A mixture of methyl 2-oxo-3-(piperidin-4-yl)-2,3-dihydro-1H-benzo[d]imidazole-5-carboxylate hydrochloride (30.0 mg, 0.0962 mmol), 2-chlorobenzoic acid (15.1 mg, 0.0962 mmol), HBTU (36.5 mg, 0.0962 mmol) and DIPEA (17.2  $\mu$ L, 0.0962 mmol) in chloroform (5 mL) was stirred at room temperature for 41 h. The solvent was removed with a stream of  $N_2$  and the residue was purified by automated normal-phase chromatography (0-100% EtOAc/heptane, 4 g silica gel cartridge) to give methyl 3-(1-(2-chlorobenzoyl)piperidin-4-yl)-2-oxo-2,3-dihydro-1H-benzo[d]imidazole-5-carboxylate (30.1 mg, 0.0727 mmol, 75.6% yield) as an off-white solid. Two amide isomers seen by  $^1H$  NMR -- one peak by LCMS

$^1H$  NMR (400 MHz,  $DMSO-d_6$ )  $\delta$  ppm 11.35 - 11.40 (m, 1 H) 7.75 - 7.83 (m, 1 H) 7.68 - 7.72 (m, 1 H) 7.54 - 7.62 (m, 1 H) 7.37 - 7.50 (m, 3 H) 7.06 - 7.12 (m, 1 H) 4.52 - 4.76 (m, 2 H) 3.83 - 3.87 (m, 3 H) 3.57 - 3.68 (m, 1 H) 3.22 - 3.31 (m, 1 H) 3.10 - 3.19 (m, 1 H) 2.94 - 3.05 (m, 1 H) 2.14 - 2.43 (m, 3 H) 1.87 (d,  $J = 10.36$  Hz, 1 H) 1.64 - 1.75 (m, 1 H)

LCMS:  $[M+1] = 414/416$ ,  $rt = 2.20$  min.

### 3-(1-(2-chlorobenzoyl)piperidin-4-yl)-2-oxo-2,3-dihydro-1H-benzo[d]imidazole-5-carboxylic acid

To a solution of methyl 3-(1-(2-chlorobenzoyl)piperidin-4-yl)-2-oxo-2,3-dihydro-1H-benzo[d]imidazole-5-carboxylate (29.0 mg, 0.0701 mmol) in methanol (5 mL) was added 1 N NaOH (210  $\mu$ L, 0.210 mmol). The resulting mixture was stirred at 60  $^\circ$ C for 72 h. After cooling, the solvent was removed under a stream of  $N_2$ , and the residue taken up in water and filtered through a syringe filter. The solution was acidified by addition of 6 N HCl and stirred for 3 h. The solid was collected by filtration, washed with water and dried under vacuum to give 3-(1-(2-chlorobenzoyl)piperidin-4-yl)-2-oxo-2,3-dihydro-1H-benzo[d]imidazole-5-carboxylic acid (12.9 mg, 0.0323 mmol, 46.0% yield) as an off-white solid. Two amide conformers seen by  $^1H$  NMR -- one peak by LCMS.

$^1H$  NMR (400 MHz,  $DMSO-d_6$ )  $\delta$  ppm 12.79 (br. s., 1 H) 11.30 - 11.33 (m, 1 H) 7.75 - 7.82 (m, 1 H) 7.67 (dd,  $J = 8.21, 1.39$  Hz, 1 H) 7.53 - 7.60 (m, 1 H) 7.35 - 7.50 (m, 3 H) 7.04 - 7.09 (m, 1 H) 4.64 - 4.76 (m, 1 H) 4.51 - 4.64 (m, 1 H) 3.21 - 3.39 (m, 2 H) 2.93 - 3.04 (m, 1 H) 2.15 - 2.43 (m, 2 H) 1.87 (d,  $J = 11.62$  Hz, 1 H) 1.69 (br. s., 1 H)

LCMS:  $[M+1] = 400/402$ ,  $rt = 1.88$  min.

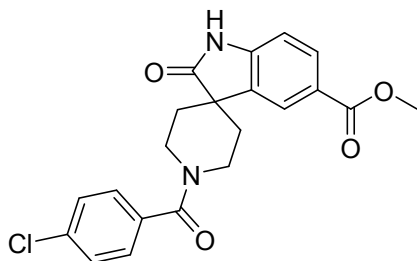

**Example LI-2174: Methyl 1'-(4-chlorobenzoyl)-2-oxospiro[indoline-3,4'-piperidine]-5-carboxylate**

To a suspension of methyl 2-oxospiro[indoline-3,4'-piperidine]-5-carboxylate hydrochloride (51.8 mg, 0.175 mmol), 4-chlorobenzoic acid (30.1 mg, 0.192 mmol) and HBTU (72.8 mg, 0.192 mmol) in chloroform (5 mL) was added DIPEA (93.5  $\mu$ L, 0.524 mmol). The resulting mixture was stirred at room temperature for 17 h. The solvent was removed with a stream of N<sub>2</sub> and the residue triturated with water/MeOH (3:1) for 18 h. The solid was collected by filtration, washed with water and dried to give methyl 1'-(4-chlorobenzoyl)-2-oxospiro[indoline-3,4'-piperidine]-5-carboxylate (63.0 mg, 0.158 mmol, 90.5% yield) as a white solid.

<sup>1</sup>H NMR (400 MHz, DMSO-*d*<sub>6</sub>)  $\delta$  ppm 10.86 (s, 1 H) 8.07 (s, 1 H) 7.88 (d, *J* = 8.34 Hz, 1 H) 7.56 - 7.59 (m, 2 H) 7.51 - 7.55 (m, 2 H) 6.97 (d, *J* = 8.08 Hz, 1 H) 4.22 (br. s., 1 H) 3.83 (s, 3 H) 3.77 (br. s., 2 H) 3.50 (br. s., 1 H) 1.94 - 2.04 (m, 2 H) 1.77 (br. s., 1 H) 1.67 (br. s., 1 H)

LCMS: [M+1] = 399/401, rt = 2.35 min.

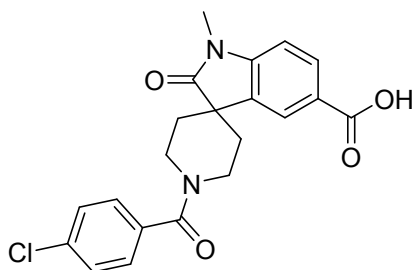

**Example LI-2192: 1'-(4-chlorobenzoyl)-1-methyl-2-oxospiro[indoline-3,4'-piperidine]-5-carboxylic acid**

A suspension of sodium hydride (6.0 mg, 0.15 mmol) in THF (2 mL) was stirred at room temperature for 10 min, then a solution of methyl 1'-(4-chlorobenzoyl)-2-oxospiro[indoline-3,4'-piperidine]-5-carboxylate (50.0 mg, 0.125 mmol) and iodomethane (9.4  $\mu$ L, 0.15 mmol) in THF (2 mL) was added portionwise over 5 min at room temperature and the resulting mixture stirred for 18 h. Added sodium hydride (6.0 mg, 0.15 mmol) and stirred an additional 24 h. The solvent was removed under a stream of N<sub>2</sub>, and the residue taken up in water and filtered through a syringe filter. The solution was acidified by addition of 6 N HCl and stirred for 2 h. The solid was collected by filtration, washed with water and dried under vacuum to give 1'-(4-chlorobenzoyl)-1-methyl-2-oxo-spiro[indoline-3,4'-piperidine]-5-carboxylic acid (44.3 mg, 0.111 mmol, 88.6% yield) as a yellow solid.

<sup>1</sup>H NMR (400 MHz, DMSO-*d*<sub>6</sub>)  $\delta$  ppm 12.76 (br. s., 1 H) 8.09 (br. s., 1 H) 7.95 (d, *J* = 7.23 Hz, 1 H) 7.58 (d, *J* = 8.02 Hz, 2 H) 7.50 - 7.55 (m, 2 H) 7.14 (d, *J* = 8.17 Hz, 1 H) 4.22 (br. s., 1 H) 3.77 (br. s., 2 H) 3.51 (br. s., 1 H) 3.18 (s, 3 H) 1.95 - 2.05 (m, 2 H) 1.77 (br. s., 1 H) 1.65 (br. s., 1 H)

LCMS: [M+1] = 413, rt = 2.22 min.



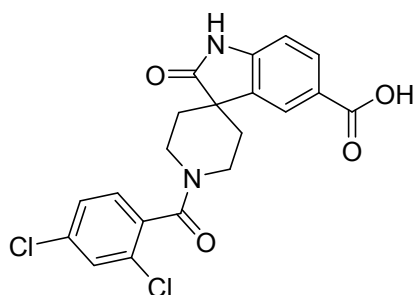

**Example LI-2260: 1'-(2,4-dichlorobenzoyl)-2-oxospiro[indoline-3,4'-piperidine]-5-carboxylic acid**

**Methyl 1'-(2,4-dichlorobenzoyl)-2-oxospiro[indoline-3,4'-piperidine]-5-carboxylate**

To a suspension of methyl 2-oxospiro[indoline-3,4'-piperidine]-5-carboxylate hydrochloride (41.0 mg, 0.138 mmol), 2,4-dichlorobenzoic acid (29.0 mg, 0.152 mmol) and HBTU (57.6 mg, 0.152 mmol) in  $\text{CHCl}_3$  (5 mL) was added DIPEA (74.0  $\mu\text{L}$ , 0.415 mmol). The resulting mixture was stirred at room temperature for 7 days (for convenience). The contents were treated with water and extracted with  $\text{CHCl}_3$  (3x). The organic layers were filtered through a cotton plug, reduced in volume with a stream of  $\text{N}_2$  and then purified by automated normal-phase chromatography (0-20% MeOH/DCM, 4 g silica gel cartridge) to give methyl 1'-(2,4-dichlorobenzoyl)-2-oxospiro[indoline-3,4'-piperidine]-5-carboxylate (50.5 mg, 0.117 mmol, 84.4% yield) as an off white solid.

$^1\text{H}$  NMR (400 MHz,  $\text{DMSO}-d_6$ )  $\delta$  ppm 10.85 - 10.91 (m, 1 H) 7.47 - 8.08 (m, 5 H) 6.94 - 7.00 (m, 1 H) 4.13 - 4.33 (m, 1 H) 3.63 - 3.89 (m, 5 H) 3.19 - 3.29 (m, 1 H) 1.59 - 2.10 (m, 4 H)

LCMS:  $[\text{M}+1] = 433/435/437$ ,  $\text{rt} = 2.53$  min.

**1'-(2,4-dichlorobenzoyl)-2-oxospiro[indoline-3,4'-piperidine]-5-carboxylic acid**

To a suspension of methyl 1'-(2,4-dichlorobenzoyl)-2-oxospiro[indoline-3,4'-piperidine]-5-carboxylate (50.5 mg, 0.117 mmol) in methanol (5 mL) was added 1 N NaOH (583  $\mu\text{L}$ , 0.583 mmol). The resulting mixture was stirred at 50  $^\circ\text{C}$  for 24 h. The solvent was removed under a stream of  $\text{N}_2$ , and the residue taken up in water and filtered through a syringe filter. The solution was acidified by addition of 6 N HCl and stirred for 3 days. The solid was collected by filtration, washed with water and dried under vacuum to give 1'-(2,4-dichlorobenzoyl)-2-oxospiro[indoline-3,4'-piperidine]-5-carboxylic acid (33.8 mg, 0.0806 mmol, 69.2% yield) as a white solid.

$^1\text{H}$  NMR (400 MHz,  $\text{DMSO}-d_6$ )  $\delta$  ppm 12.70 (br. s., 1 H) 10.79 - 10.87 (m, 1 H) 7.46 - 8.06 (m, 5 H) 6.90 - 6.98 (m, 1 H) 4.11 - 4.29 (m, 1 H) 3.62 - 3.92 (m, 2 H) 3.20 - 3.29 (m, 1 H) 1.60 - 2.06 (m, 4 H)

LCMS:  $[\text{M}+1] = 419/421/423$ ,  $\text{rt} = 2.18$  min.

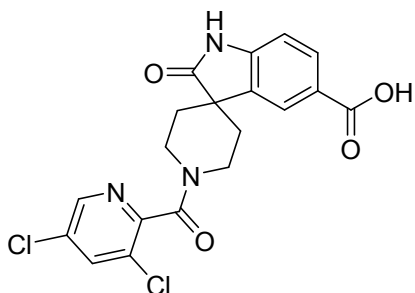

**Example LI-2180: 1'-(3,5-dichloropyridin-2-yl)-2-oxospiro[indoline-3,4'-piperidine]-5-carboxylic acid**

**Methyl 1'-(3,5-dichloropyridin-2-yl)-2-oxospiro[indoline-3,4'-piperidine]-5-carboxylate**

To a suspension of methyl 2-oxospiro[indoline-3,4'-piperidine]-5-carboxylate hydrochloride (40.0 mg, 0.135 mmol), 3,5-dichloropyridine-2-carboxylic acid (28.5 mg, 0.148 mmol) and HBTU (56.2 mg, 0.148 mmol) in chloroform (5 mL) was added DIPEA (72.2  $\mu$ L, 0.404 mmol). The resulting mixture was stirred at room temperature for 21 h. The solvent was removed with a stream of  $N_2$  and the residue triturated with water/MeOH (5:1) for 18 h. The solid was collected by filtration, washed with water and dried to give methyl 1'-(3,5-dichloropyridin-2-yl)-2-oxospiro[indoline-3,4'-piperidine]-5-carboxylate (29.2 mg, 0.0672 mmol, 49.9% yield) as a white solid.

$^1H$  NMR (400 MHz,  $DMSO-d_6$ )  $\delta$  ppm 10.93 (s, 1 H) 8.71 (d,  $J = 2.02$  Hz, 1 H) 8.44 (d,  $J = 2.02$  Hz, 1 H) 7.87 - 7.93 (m, 2 H) 6.99 (d,  $J = 8.08$  Hz, 1 H) 4.10 - 4.22 (m, 1 H) 3.79 - 3.92 (m, 4 H) 3.63 - 3.74 (m, 1 H) 3.23 - 3.32 (m, 1 H) 1.69 - 1.96 (m, 4 H)

LCMS:  $[M+1] = 434/436$ ,  $rt = 2.22$  min.

**1'-(3,5-dichloropyridin-2-yl)-2-oxospiro[indoline-3,4'-piperidine]-5-carboxylic acid**

To a solution of methyl 1'-(3,5-dichloropyridin-2-yl)-2-oxospiro[indoline-3,4'-piperidine]-5-carboxylate (29.2 mg, 0.0672 mmol) in methanol (5 mL) was added 1 N NaOH (135  $\mu$ L, 0.135 mmol). The resulting mixture was stirred at room temperature for 22 h, then at 50  $^{\circ}C$  for 48 h. The solvent was removed with a stream of  $N_2$  to give a residue which was purified by automated normal-phase chromatography (0-20% MeOH/DCM, 4 g silica gel cartridge) to give 1'-(3,5-dichloropyridin-2-yl)-2-oxospiro[indoline-3,4'-piperidine]-5-carboxylic acid (18.0 mg, 0.0428 mmol, 63.7% yield) as a white solid.

$^1H$  NMR (400 MHz,  $DMSO-d_6$ )  $\delta$  ppm 12.76 (br. s., 1 H) 10.89 (s, 1 H) 8.71 (d,  $J = 2.02$  Hz, 1 H) 8.44 (d,  $J = 2.02$  Hz, 1 H) 7.84 - 7.90 (m, 2 H) 6.96 (d,  $J = 8.34$  Hz, 1 H) 4.09 - 4.20 (m, 1 H) 3.84 - 3.93 (m, 1 H) 3.63 - 3.73 (m, 1 H) 3.28 (d,  $J = 13.89$  Hz, 1 H) 1.86 (d,  $J = 4.80$  Hz, 2 H) 1.71 - 1.80 (m, 2 H)

LCMS:  $[M+1] = 420/422/424$ ,  $rt = 1.90$  min.

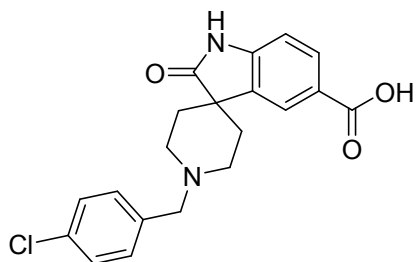

**Example LI-2178: 1'-(4-chlorobenzyl)-2-oxospiro[indoline-3,4'-piperidine]-5-carboxylic acid**

**Methyl 1'-(4-chlorobenzyl)-2-oxospiro[indoline-3,4'-piperidine]-5-carboxylate**

A suspension of methyl 2-oxospiro[indoline-3,4'-piperidine]-5-carboxylate hydrochloride (56.5 mg, 0.190 mmol), 4-chlorobenzaldehyde (29.4 mg, 0.209 mmol) and sodium triacetoxyborohydride (121 mg, 0.571 mmol) in chloroform (5 mL) was stirred at room temperature for 26 h. The solvent was removed with a stream of N<sub>2</sub> and the residue was partitioned between water and EtOAc. The solvent was removed from the organic layer with a stream of N<sub>2</sub> to give a residue which was purified by automated normal-phase chromatography (0-20% MeOH/DCM, 4 g silica gel cartridge) to give methyl 1'-[(4-chlorophenyl)methyl]-2-oxospiro[indoline-3,4'-piperidine]-5-carboxylate acetate (72.0 mg, 0.162 mmol, 85.0% yield) as a colorless gum.

<sup>1</sup>H NMR (400 MHz, DMSO-*d*<sub>6</sub>) δ ppm 12.02 (br. s., 1 H) 10.82 (s, 1 H) 7.96 (s, 1 H) 7.87 (d, *J* = 8.08 Hz, 1 H) 7.42 (s, 4 H) 6.96 (d, *J* = 8.08 Hz, 1 H) 3.83 (s, 3 H) 3.63 (s, 2 H) 2.83 (br. s., 2 H) 2.56 (br. s., 2 H) 1.92 (s, 3 H) 1.81 (br. s., 2 H) 1.71 (br. s., 2 H)

LCMS: [M+1] = 385/387, rt = 2.01 min.

**1'-(4-chlorobenzyl)-2-oxospiro[indoline-3,4'-piperidine]-5-carboxylic acid**

To a solution of methyl 1'-[(4-chlorophenyl)methyl]-2-oxospiro[indoline-3,4'-piperidine]-5-carboxylate acetate (72.0 mg, 0.162 mmol) in methanol (5 mL) was added 1 N NaOH (485 μL, 0.485 mmol). The resulting mixture was stirred at room temperature for 18 h, then at 50 °C for 31 h. After cooling, 6 N HCl (27 μL, 1 eq.) was added and the solvent removed with a stream of N<sub>2</sub> to give a residue which was purified by automated normal-phase chromatography (0-40% MeOH/DCM, 4 g silica gel cartridge) to give 1'-[(4-chlorophenyl)methyl]-2-oxospiro[indoline-3,4'-piperidine]-5-carboxylic acid (29.1 mg, 0.0785 mmol, 48.5% yield) as a white solid.

<sup>1</sup>H NMR (400 MHz, DMSO-*d*<sub>6</sub>) δ ppm 10.79 (s, 1 H) 7.98 (s, 1 H) 7.86 (dd, *J* = 8.21, 1.64 Hz, 1 H) 7.37 - 7.46 (m, 4 H) 6.94 (d, *J* = 8.08 Hz, 1 H) 3.63 (br. s., 2 H) 2.84 (br. s., 2 H) 2.56 (br. s., 2 H) 1.78 - 1.88 (m, 2 H) 1.71 (br. s., 2 H)

LCMS: [M+1] = 371/373, rt = 1.99 min.

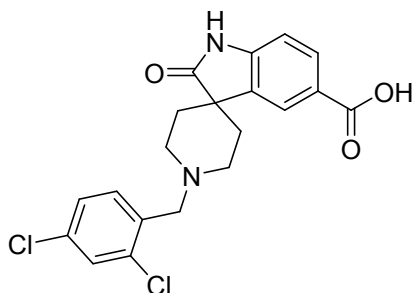

**Example LI-2242: 1'--(2,4-dichlorobenzyl)-2-oxospiro[indoline-3,4'-piperidine]-5-carboxylic acid**

**Methyl 1'--(2,4-dichlorobenzyl)-2-oxospiro[indoline-3,4'-piperidine]-5-carboxylate**

A suspension of methyl 2-oxospiro[indoline-3,4'-piperidine]-5-carboxylate hydrochloride (41.4 mg, 0.140 mmol), 2,4-dichlorobenzaldehyde (26.9 mg, 0.154 mmol) and sodium triacetoxyborohydride (88.7 mg, 0.419 mmol) in  $\text{CHCl}_3$  (5 mL) was stirred at room temperature for 4 days (for convenience). The contents were treated with 5%  $\text{Na}_2\text{CO}_3$  and extracted with  $\text{CHCl}_3$  (3x) and passed through a cotton plug. The solvent was removed with a stream of  $\text{N}_2$  to give a residue which was purified by automated normal-phase chromatography (0-20% MeOH/DCM, 4 g silica gel cartridge) to give methyl 1'-[(2,4-dichlorophenyl)methyl]-2-oxospiro[indoline-3,4'-piperidine]-5-carboxylate (44.8 mg, 0.107 mmol, 76.6% yield) as a white solid.

$^1\text{H}$  NMR (400 MHz,  $\text{DMSO}-d_6$ )  $\delta$  ppm 10.83 (s, 1 H) 7.98 (d,  $J = 1.52$  Hz, 1 H) 7.88 (dd,  $J = 8.08, 1.52$  Hz, 1 H) 7.62 - 7.65 (m, 2 H) 7.45 (dd,  $J = 8.34, 2.27$  Hz, 1 H) 6.97 (d,  $J = 8.08$  Hz, 1 H) 3.83 (s, 3 H) 3.70 (s, 2 H) 2.90 (td,  $J = 7.58, 3.54$  Hz, 2 H) 2.63 (dt,  $J = 7.39, 3.76$  Hz, 2 H) 1.80 - 1.87 (m, 2 H) 1.71 - 1.79 (m, 2 H)

LCMS:  $[\text{M}+1] = 419/421/423$ ,  $\text{rt} = 2.07$  min.

**1'--(2,4-dichlorobenzyl)-2-oxospiro[indoline-3,4'-piperidine]-5-carboxylic acid**

To a suspension of methyl 1'-[(2,4-dichlorophenyl)methyl]-2-oxospiro[indoline-3,4'-piperidine]-5-carboxylate (44.8 mg, 0.107 mmol) in methanol (5 mL) was added 1 N NaOH (534  $\mu\text{L}$ , 0.534 mmol). The resulting mixtures was stirred at 50  $^\circ\text{C}$  for 22 h. After cooling, the solvent was removed under a stream of  $\text{N}_2$ , and the residue taken up in water and filtered through a syringe filter. The solution was carefully neutralized by addition of 2 N HCl and stirred for 3 h. The solid was collected by filtration, washed with water and dried under vacuum to give 1'-[(2,4-dichlorophenyl)methyl]-2-oxospiro[indoline-3,4'-piperidine]-5-carboxylic acid (38.0 mg, 0.0938 mmol, 87.8% yield) as a white solid.

$^1\text{H}$  NMR (400 MHz,  $\text{DMSO}-d_6$ )  $\delta$  ppm 12.72 (br. s., 1 H) 10.79 (s, 1 H) 7.99 (s, 1 H) 7.86 (dd,  $J = 8.08, 1.52$  Hz, 1 H) 7.61 - 7.66 (m, 2 H) 7.45 (dd,  $J = 8.34, 2.27$  Hz, 1 H) 6.94 (d,  $J = 8.08$  Hz, 1 H) 3.70 (s, 2 H) 2.89 (d,  $J = 7.83$  Hz, 2 H) 2.63 (br. s., 2 H) 1.83 (d,  $J = 8.08$  Hz, 2 H) 1.74 (br. s., 2 H)

LCMS:  $[\text{M}+1] = 405/407/409$ ,  $\text{rt} = 1.88$  min.

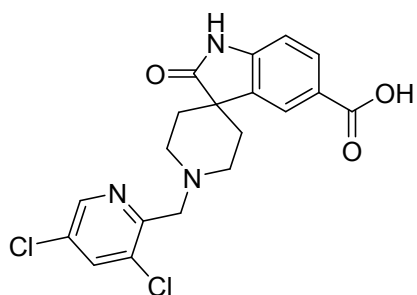

**Example LI-2263: 1'-((3,5-dichloropyridin-2-yl)methyl)-2-oxospiro[indoline-3,4'-piperidine]-5-carboxylic acid**

**Methyl 1'-((3,5-dichloropyridin-2-yl)methyl)-2-oxospiro[indoline-3,4'-piperidine]-5-carboxylate**

A mixture of methyl 2-oxospiro[indoline-3,4'-piperidine]-5-carboxylate hydrochloride (48.8 mg, 0.164 mmol), 3,5-dichloropyridine-2-carboxaldehyde (17.5  $\mu$ L, 0.181 mmol) and sodium triacetoxyborohydride (104.6 mg, 0.493 mmol) in  $\text{CHCl}_3$  (5 mL) was stirred at room temperature for 6 days (for convenience). The contents were treated with 10%  $\text{Na}_2\text{CO}_3$  and extracted with  $\text{CHCl}_3$  (3x) and passed through a cotton plug. The solvent was removed with a stream of  $\text{N}_2$  to give a residue which was purified by automated normal-phase chromatography (0-20% MeOH/DCM, 4 g silica gel cartridge) to give methyl 1'-[(3,5-dichloro-2-pyridyl)methyl]-2-oxospiro[indoline-3,4'-piperidine]-5-carboxylate (25.0 mg, 0.0595 mmol, 36.2% yield) as an off-white solid.

$^1\text{H}$  NMR (400 MHz,  $\text{DMSO}-d_6$ )  $\delta$  ppm 10.80 (s, 1 H) 8.63 (d,  $J = 2.20$  Hz, 1 H) 8.25 (d,  $J = 2.20$  Hz, 1 H) 7.98 (s, 1 H) 7.87 (dd,  $J = 8.17, 1.73$  Hz, 1 H) 6.96 (d,  $J = 8.17$  Hz, 1 H) 3.87 (s, 2 H) 3.83 (s, 3 H) 2.90 - 2.96 (m, 2 H) 2.72 - 2.80 (m, 2 H) 1.76 - 1.84 (m, 2 H) 1.61 - 1.69 (m, 2 H)

LCMS:  $[\text{M}+1] = 434/436/438$ ,  $\text{rt} = 1.94$  min.

**1'-((3,5-dichloropyridin-2-yl)methyl)-2-oxospiro[indoline-3,4'-piperidine]-5-carboxylic acid**

To a suspension of methyl 1'-[(3,5-dichloro-2-pyridyl)methyl]-2-oxospiro[indoline-3,4'-piperidine]-5-carboxylate (25.0 mg, 0.0595 mmol) in methanol (5 mL) was added 1 N NaOH (297  $\mu$ L, 0.297 mmol). The resulting mixture was stirred at 60  $^\circ\text{C}$  for 24 h. The solvent was removed under a stream of  $\text{N}_2$ , and the residue taken up in water and filtered through a syringe filter. The solution was acidified by addition of 6 N HCl and stirred for 18 h. The solid was collected by filtration, washed with water and dried under vacuum to give 1'-[(3,5-dichloro-2-pyridyl)methyl]-2-oxospiro[indoline-3,4'-piperidine]-5-carboxylic acid hydrochloride (12.1 mg, 0.0273 mmol, 45.948% yield) as a white solid.

$^1\text{H}$  NMR (400 MHz,  $\text{DMSO}-d_6$ )  $\delta$  ppm 12.77 (br. s., 1 H) 10.90 - 11.10 (m, 1 H) 10.08 - 10.52 (m, 1 H) 8.76 - 8.89 (m, 1 H) 8.36 - 8.49 (m, 2 H) 7.86 - 7.96 (m, 1 H) 7.81 (s, 1 H) 6.94 - 7.05 (m, 1 H) 4.77 - 5.03 (m, 2 H) 3.55 - 3.86 (m, 4 H) 1.92 - 2.30 (m, 2 H)

LCMS:  $[\text{M}+1] = 406/408/410$ ,  $\text{rt} = 1.71$  min.

**Supplemental Table 1.** Summary of IC<sub>50</sub> for 123 hits tested in 10 point-dose-response assay.

| FORMATTED_ID | COMMENTS        | IC50 (μM) qHTS | IC50 (μM) 384 wells |
|--------------|-----------------|----------------|---------------------|
| LI-0001737   | NCGC00016107-09 | 9.2            | 5.9                 |
| LI-0001736   | NCGC00021152-06 | 3.7            | 6.6                 |
| LI-0001739   | NCGC00025170-13 | 5.2            | 179.4               |
| LI-0001742   | NCGC00115156-01 | 7.3            | 23.8                |
| LI-0001743   | NCGC00119360-01 | 18.4           | 72.9                |
| LI-0001745   | NCGC00123043-01 | 7.3            | 177.4               |
| LI-0001747   | NCGC00137614-01 | 4.6            | 31.8                |
| LI-0001748   | NCGC00139237-01 | 9.2            | 24.9                |
| LI-0001749   | NCGC00139422-01 | 10.3           | 34.9                |
| LI-0001750   | NCGC00140605-02 | 10.3           | 47.8                |
| LI-0001752   | NCGC00165880-06 | 5.8            | 28.1                |
| LI-0001753   | NCGC00165913-03 | 18.4           | 2.2                 |
| LI-0001754   | NCGC00167761-04 | 1.5            | 7.6                 |
| LI-0001755   | NCGC00168759-10 | 9.2            | 13.4                |
| LI-0001751   | NCGC00182059-03 | 6.5            | 15.2                |
| LI-0001757   | NCGC00241455-08 | 10.3           | 76.0                |
| LI-0001759   | NCGC00244250-02 | 10.3           | 136.4               |
| LI-0001756   | NCGC00346436-02 | 3.3            | 2.8                 |
| LI-0001815   | NCGC00346488-06 | 10.3           | 164.6               |
| LI-0001761   | NCGC00346678-04 | 9.2            | 176.8               |
| LI-0001762   | NCGC00346950-03 | 4.1            | 79.1                |
| LI-0001766   | NCGC00373874-01 | 16.4           | 188.0               |
| LI-0001768   | NCGC00374143-01 | 10.6           | 28.5                |
| LI-0001769   | NCGC00374177-01 | 13.3           | 33.8                |
| LI-0001770   | NCGC00374926-01 | 16.4           | 60.1                |
| LI-0001772   | NCGC00374945-01 | 4.6            | 5.7                 |
| LI-0001773   | NCGC00374956-01 | 5.2            | 5.9                 |
| LI-0001774   | NCGC00375051-01 | 5.8            | 19.8                |
| LI-0001775   | NCGC00375073-01 | 1.3            | 8.9                 |
| LI-0001771   | NCGC00375083-01 | 5.8            | 178.4               |
| LI-0001776   | NCGC00375309-01 | 12.8           | 44.3                |
| LI-0001777   | NCGC00375726-01 | 16.4           | 107.0               |
| LI-0001780   | NCGC00379223-01 | 10.3           | 57.9                |
| LI-0001782   | NCGC00386401-02 | 8.2            | 101.9               |
| LI-0001783   | NCGC00386412-04 | 3.7            | 4.0                 |
| LI-0001784   | NCGC00387229-03 | 3.3            | 135.4               |
| LI-0001785   | NCGC00387768-01 | 6.5            | 65.7                |
| LI-0001786   | NCGC00387872-01 | 9.2            | 109.7               |
| LI-0001787   | NCGC00391735-01 | 4.6            | 35.3                |

|            |                 |      |       |
|------------|-----------------|------|-------|
| LI-0001788 | NCGC00395836-01 | 10.3 | 109.7 |
| LI-0001794 | NCGC00397895-01 | 16.8 | 101.9 |
| LI-0001792 | NCGC00411983-01 | 0.9  | 11.6  |
| LI-0001793 | NCGC00411987-01 | 3.3  | 11.5  |
| LI-0001795 | NCGC00411993-01 | 11.9 | 123.3 |
| LI-0001796 | NCGC00412056-01 | 15.8 | 138.8 |
| LI-0001797 | NCGC00412066-01 | 12.6 | 86.9  |
| LI-0001798 | NCGC00412087-01 | 15.8 | 65.6  |
| LI-0001799 | NCGC00412153-01 | 17.8 | 69.0  |
| LI-0001801 | NCGC00412164-01 | 12.6 | 76.7  |
| LI-0001802 | NCGC00412172-01 | 14.9 | 180.1 |
| LI-0001803 | NCGC00412203-01 | 4.2  | 105.3 |
| LI-0001804 | NCGC00412222-01 | 9.4  | 62.0  |
| LI-0001806 | NCGC00412275-01 | 15.8 | 90.7  |
| LI-0001807 | NCGC00412293-01 | 14.9 | 149.9 |
| LI-0001847 | NCGC00412442-01 | 14.9 | 79.6  |
| LI-0001858 | NCGC00412595-01 | 14.9 | 65.4  |
| LI-0001758 | NCGC00412658-01 | 6.7  | 29.6  |
| LI-0001810 | NCGC00416618-01 | 4.2  | 16.0  |
| LI-0001811 | NCGC00416629-01 | 26.6 | 35.8  |
| LI-0001812 | NCGC00417466-01 | 14.9 | 57.2  |
| LI-0001856 | NCGC00417481-01 | 14.9 | 103.4 |
| LI-0001857 | NCGC00417519-01 | 14.9 | 29.8  |
| LI-0001813 | NCGC00419079-01 | 3.5  | 15.9  |
| LI-0001814 | NCGC00419100-01 | 2.7  | 80.6  |
| LI-0001817 | NCGC00419103-01 | 14.9 | 18.1  |
| LI-0001819 | NCGC00419114-01 | 10.6 | 25.5  |
| LI-0001821 | NCGC00419125-01 | 1.9  | 27.1  |
| LI-0001822 | NCGC00419140-01 | 13.3 | 35.2  |
| LI-0001824 | NCGC00419160-01 | 11.9 | 140.0 |
| LI-0001826 | NCGC00419173-01 | 7.5  | 111.8 |
| LI-0001828 | NCGC00419210-01 | 1.9  | 8.1   |
| LI-0001832 | NCGC00421835-01 | 10.3 | 69.9  |
| LI-0001850 | NCGC00422007-01 | 20.6 | 2.2   |
| LI-0001851 | NCGC00422009-01 | 9.2  | 1.5   |
| LI-0001852 | NCGC00422010-01 | 9.2  | 2.9   |
| LI-0001853 | NCGC00422011-01 | 16.4 | 4.5   |
| LI-0001849 | NCGC00422014-01 | 16.4 | 2.2   |
| LI-0001833 | NCGC00432183-01 | 2.9  | 148.7 |
| LI-0001834 | NCGC00435449-01 | 10.3 | 22.8  |
| LI-0001837 | NCGC00476381-01 | 4.2  | 5.3   |

|            |                 |      |      |
|------------|-----------------|------|------|
| LI-0001838 | NCGC00480624-01 | 8.2  | 16.4 |
| LI-0001839 | NCGC00480633-01 | 13.3 | 63.6 |
| LI-0001848 | NCGC00480634-01 | 5.9  | 37.5 |
| LI-0001840 | NCGC00480636-01 | 9.2  | 54.9 |
| LI-0001841 | NCGC00480642-01 | 11.6 | 88.7 |
| LI-0001842 | NCGC00480646-01 | 4.1  | 6.8  |
| LI-0001843 | NCGC00482115-01 | 7.3  | 80.1 |
| LI-0001844 | NCGC00485900-01 | 7.3  | 30.6 |
| LI-0001845 | NCGC00500370-01 | 8.2  | 56.5 |
| LI-0001846 | NCGC00501004-01 | 16.8 | 8.7  |



**Supplemental Table 2.** Inhibition against 58 kinases by 10  $\mu$ M LI-2172 and LI-2242

Percentage inhibition by compounds (KinaseProfiler by Eurofins Discovery )

|                      | LI-2172 / 3 @ 10 $\mu$ M | LI-2242 / 2 @ 10 $\mu$ M |
|----------------------|--------------------------|--------------------------|
| Abl(h)               | -4                       | -21                      |
| ALK(h)               | -12                      | 2                        |
| AMPK $\alpha$ 1(h)   | 7                        | 6                        |
| ASK1(h)              | -10                      | -3                       |
| Aurora-A(h)          | -9                       | 15                       |
| CaMKI(h)             | 13                       | 20                       |
| CDK1/cyclinB(h)      | 8                        | 5                        |
| CDK2/cyclinA(h)      | -1                       | -25                      |
| CDK6/cyclinD3(h)     | 25                       | 1                        |
| CDK7/cyclinH/MAT1(h) | -17                      | 3                        |
| CDK9/cyclin T1(h)    | -28                      | 4                        |
| CHK1(h)              | -19                      | -25                      |
| CK1 $\gamma$ 1(h)    | -19                      | 27                       |
| CK2 $\alpha$ 2(h)    | 20                       | 24                       |
| c-RAF(h)             | -1                       | 25                       |
| DRAK1(h)             | -1                       | -9                       |
| eEF-2K(h)            | 9                        | 9                        |
| EGFR(h)              | -7                       | -11                      |
| EphA5(h)             | 27                       | 6                        |
| EphB4(h)             | -9                       | -17                      |
| Fyn(h)               | 10                       | 10                       |
| GSK3 $\beta$ (h)     | -4                       | -7                       |
| IGF-1R(h)            | -16                      | 1                        |
| IKK $\alpha$ (h)     | 6                        | 13                       |
| IRAK4(h)             | 10                       | 26                       |
| JAK2(h)              | 19                       | 16                       |
| KDR(h)               | 9                        | 16                       |
| LOK(h)               | 13                       | 4                        |
| Lyn(h)               | -1                       | -2                       |
| MAPKAP-K2(h)         | -7                       | 20                       |
| MEK1(h)              | -7                       | -9                       |
| MLK1(h)              | 3                        | 11                       |
| Mnk2(h)              | -24                      | -9                       |
| MSK2(h)              | -9                       | -11                      |
| MST1(h)              | -1                       | 7                        |
| mTOR(h)              | 8                        | 6                        |
| NEK2(h)              | -4                       | 6                        |
| p70S6K(h)            | 20                       | 17                       |
| PAK2(h)              | 1                        | -11                      |
| PDGFR $\beta$ (h)    | -11                      | -3                       |
| Pim-1(h)             | 2                        | -2                       |
| PKA(h)               | 3                        | 11                       |
| PKB $\alpha$ (h)     | 4                        | -1                       |
| PKC $\alpha$ (h)     | 19                       | 4                        |

|                                              |     |     |
|----------------------------------------------|-----|-----|
| PKC $\theta$ (h)                             | -16 | 6   |
| PKG1 $\alpha$ (h)                            | 10  | 5   |
| Plk3(h)                                      | -12 | -11 |
| PRAK(h)                                      | 7   | -29 |
| ROCK-I(h)                                    | 3   | 7   |
| Rse(h)                                       | -7  | -10 |
| Rsk1(h)                                      | 8   | 7   |
| SAPK2a(h)                                    | 1   | -5  |
| SRPK1(h)                                     | -1  | 18  |
| TAK1(h)                                      | 9   | 3   |
| PI3 Kinase (p110 $\beta$ /p85 $\alpha$ )(h)  | 0   | 0   |
| PI3 Kinase (p120 $\gamma$ )(h)               | 0   | 0   |
| PI3 Kinase (p110 $\delta$ /p85 $\alpha$ )(h) | 3   | 1   |
| PI3 Kinase (p110 $\alpha$ /p85 $\alpha$ )(h) | 1   | 8   |
